# Supplementary material for: A hybrid polymer protective layer with uniform Li+ flux and self-adaption enabling dendrite-free Li metal anodes
Source: Royal Society of Chemistry journal article supplement (doi:10.1039/d3na00248a), 2023-01-01
Supplement: d3na00248a1.pdf [file d3na00248a1.pdf]

# A hybrid polymer protective layer with uniform $\text{Li}^+$ flux and self-adaption enabling dendrite-free Li metal anode

Chaohui Wei<sup>a</sup>, Jinxiang Deng<sup>b</sup>, Jianxiong Xing<sup>ab</sup>, Zihao Wang<sup>ab</sup>, Zhicui Song<sup>ab</sup>, Donghuan Wang<sup>a</sup>, Jicheng Jiang<sup>a</sup>, Xin Wang<sup>a</sup>, Aijun Zhou<sup>ab</sup>, Wei Zou<sup>c</sup>, and Jingze Li<sup>\*ab</sup>

<sup>a</sup> Yangtze Delta Region Institute (Huzhou), University of Electronic Science and Technology of China, Huzhou 313001, China

<sup>b</sup> School of Materials and Energy, University of Electronic Science and Technology of China, Chengdu 611731, China. E-mail: lijingze@uestc.edu.cn

<sup>c</sup> Lithium Resources and Lithium Materials Key Laboratory of Sichuan Province, Tianqi Lithium Co., Ltd., Chengdu 610093, China

\*Corresponding author. E-mail address: lijingze@uestc.edu.cn (J. Li).

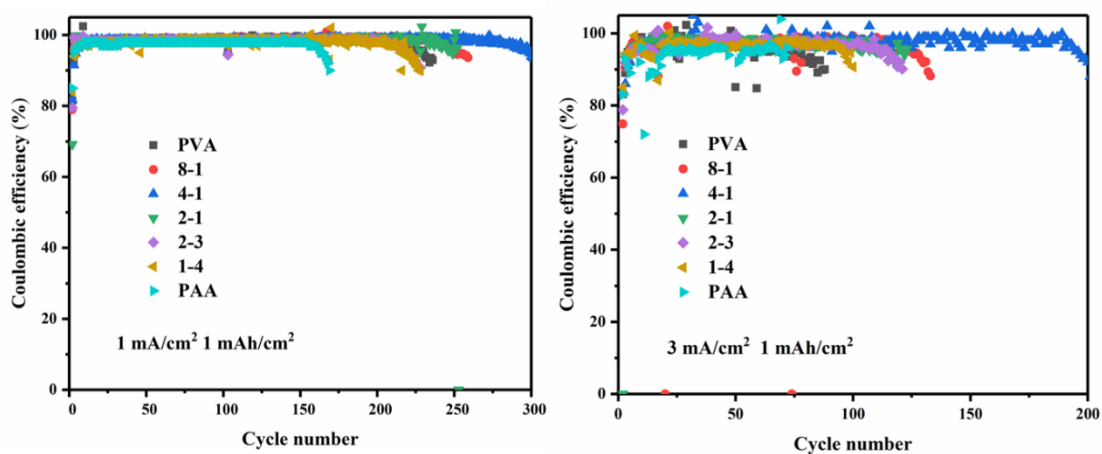

Fig. S1. CE test of Cu foil coated with PVA-PAA film of different weight proportion in (a)  $1 \text{ mA cm}^{-2}$  and  $1 \text{ mAh cm}^{-2}$ ; (b)  $3 \text{ mA cm}^{-2}$  and  $1 \text{ mAh cm}^{-2}$ .

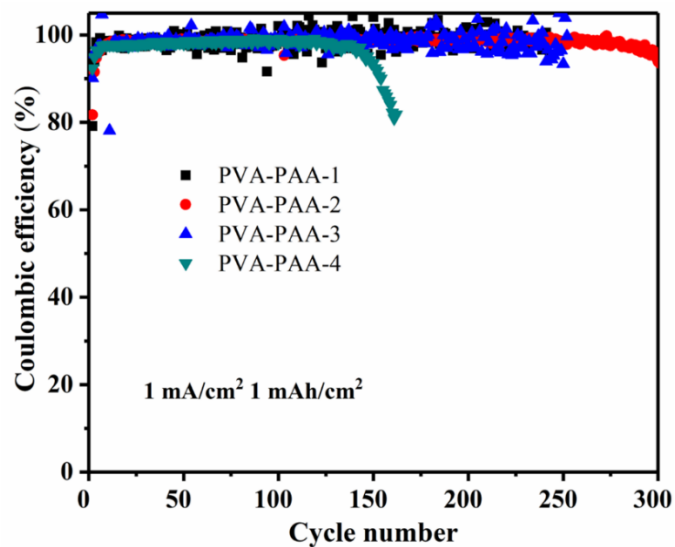

Fig. S2. CE test of Cu foil coated with PVA-PAA film of difference thickness under 1 mA cm<sup>-2</sup> and 1 mAh cm<sup>-2</sup>.

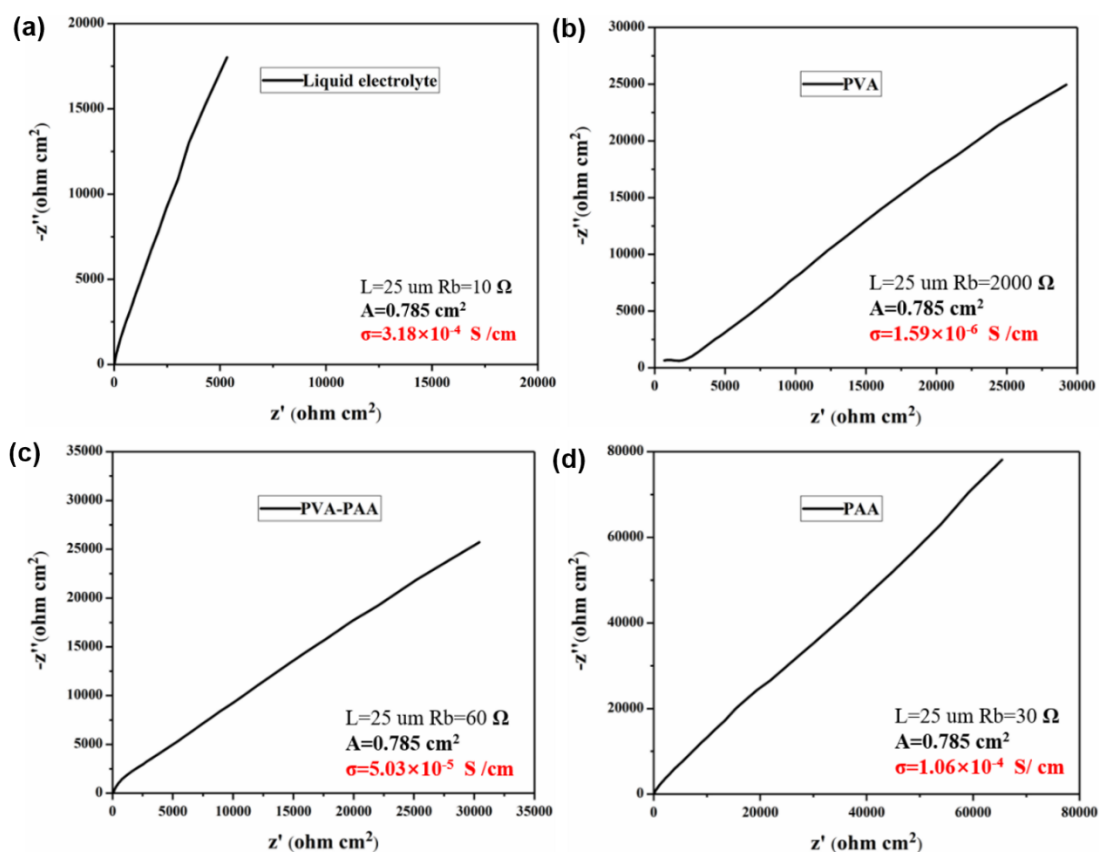

Fig. S3. Impedance spectra and Ionic conductivities of (a) the liquid electrolyte, (b) PVA, (c) PVA-PAA, and (d) PAA film.

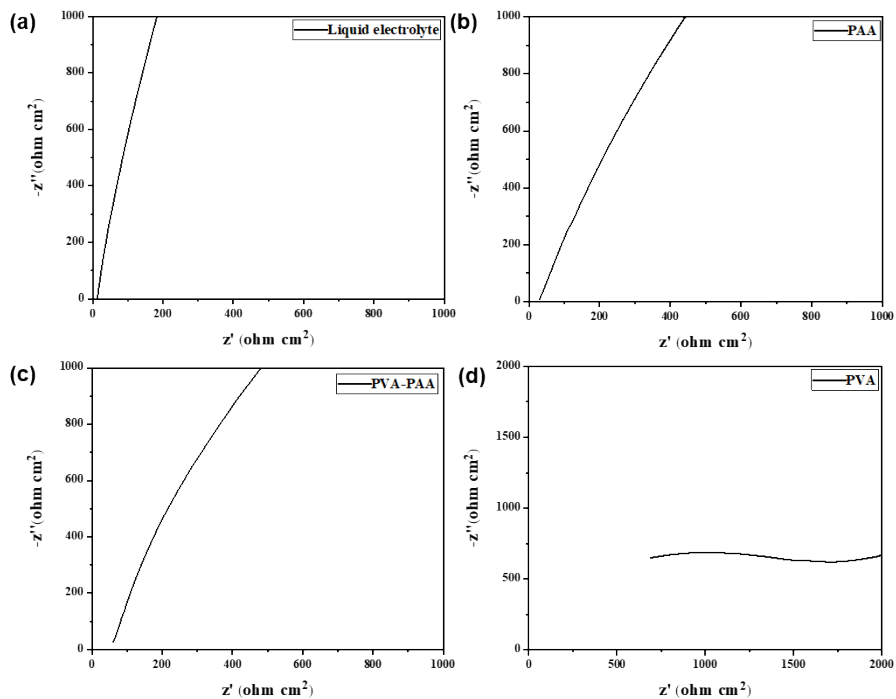

Fig. S4. Enlarge impedance spectra and Ionic conductivities of (a) the liquid electrolyte, (b) PVA, (c) PVA-PAA, and (d) PAA film.

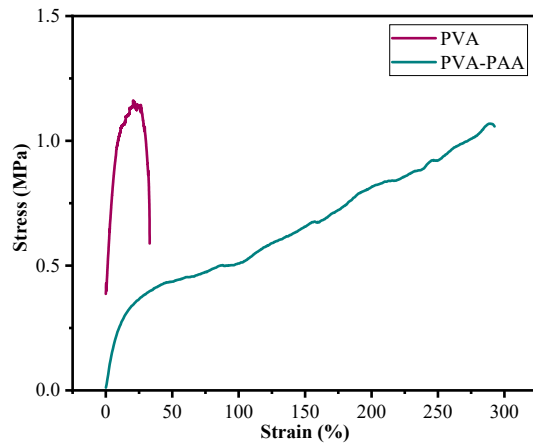

Fig. S5. Stress-strain profile of the PVA-PAA composite and PAA film.

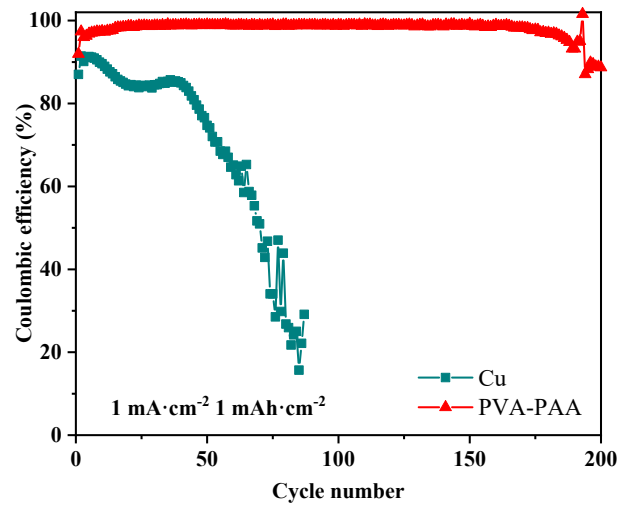

Fig. S6. CE test of Cu foil coated with PVA-PAA film and bare Cu foil under  $1 \text{ mA cm}^{-2}$  and  $1 \text{ mAh cm}^{-2}$ .

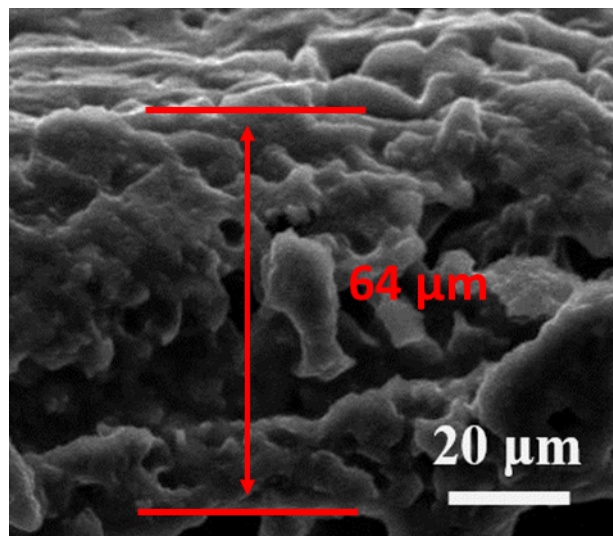

Fig. S7. Cross-sectional morphology of Li deposited on Cu foil, after depositing  $5 \text{ mAh cm}^{-2}$  of Li with a current density of  $0.5 \text{ mA cm}^{-2}$ .

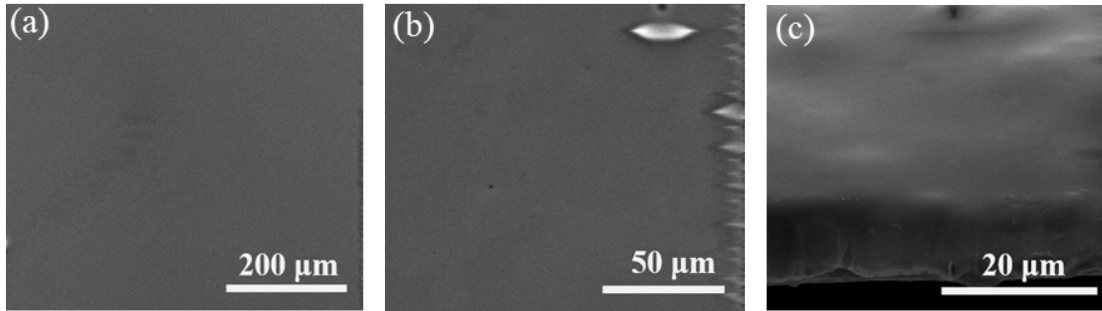

Fig. S8. (a-b) Surface and (c) cross-sectional SEM images of Li dissolution on Cu foil.

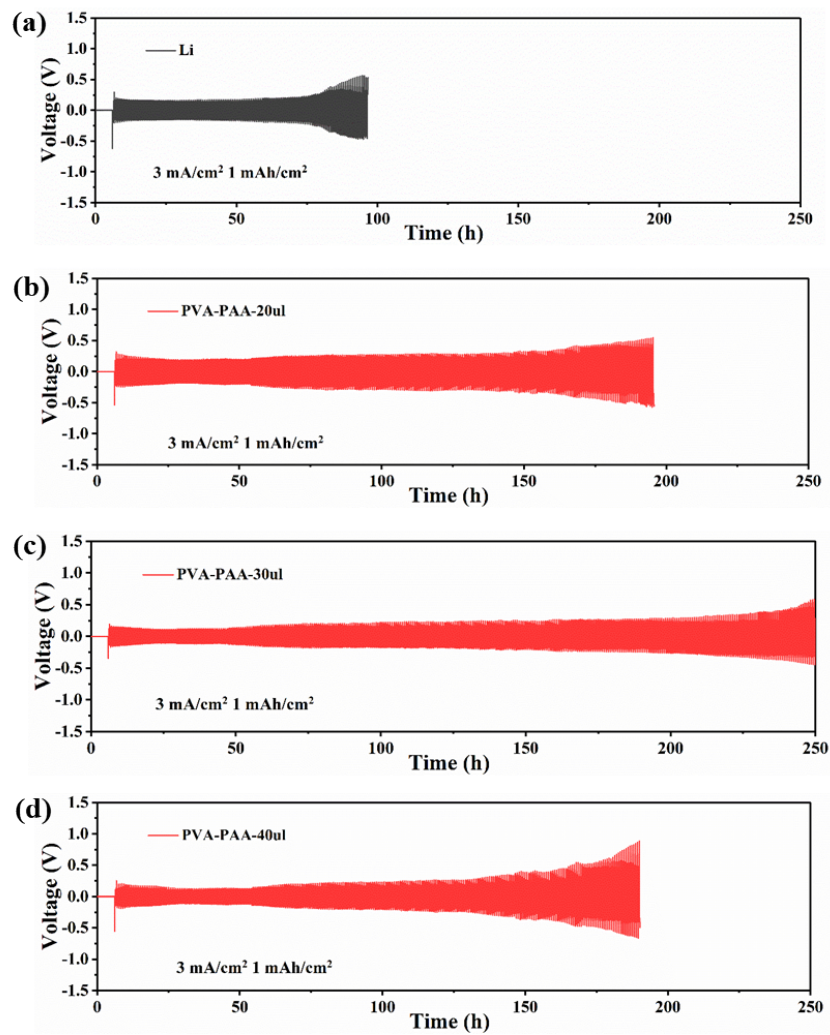

Fig. S9. Cycling performances of symmetric cells of Li foil coated with PVA-PAA layer of different thickness at 3 mA cm<sup>-2</sup> and 1 mAh cm<sup>-2</sup>.

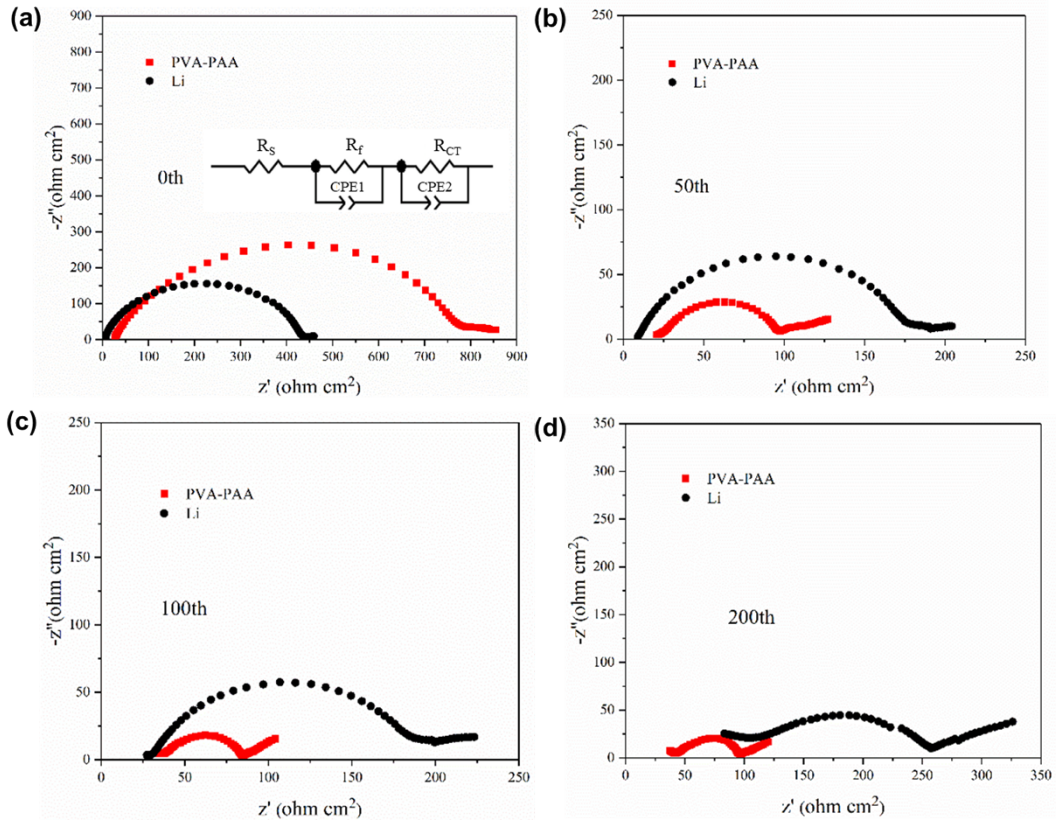

Fig. S10. Nyquist plots of symmetric cell of Li foil with and without coating at (a) 0th, (b) 50th, (c) 100th and (d) 200th cycles at  $1 \text{ mA cm}^{-2}$  and  $1 \text{ mAh cm}^{-2}$ . The inset is the equivalent circuit.

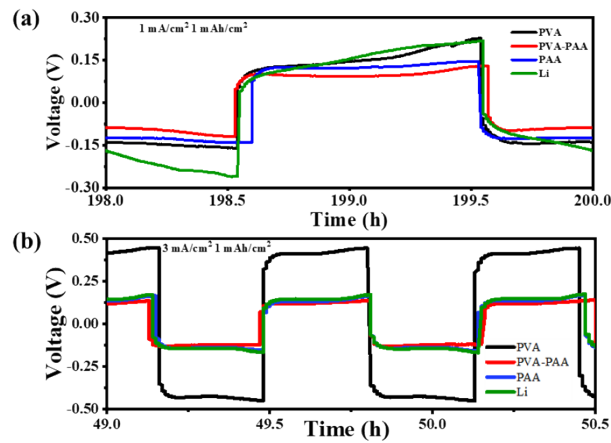

Fig. S11. Cycling performances of four symmetric cells at the selected period at (a)  $1 \text{ mA cm}^{-2} / 1 \text{ mAh cm}^{-2}$ , and (b)  $3 \text{ mA cm}^{-2} / 1 \text{ mAh cm}^{-2}$ .

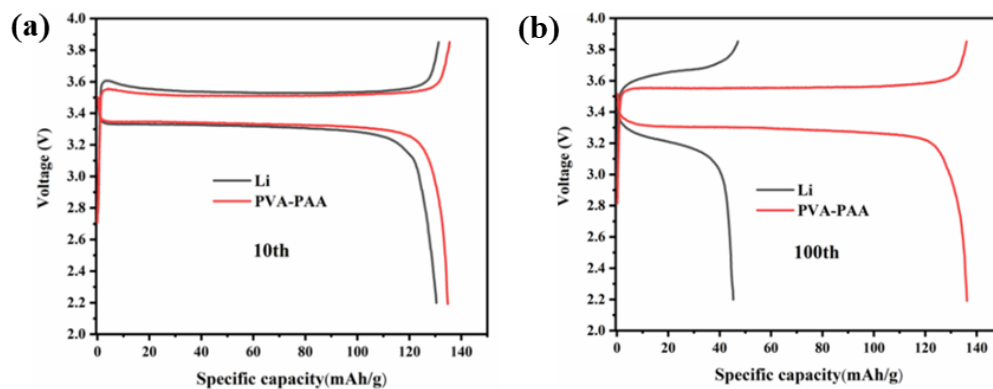

Fig. S12. Galvano-charge/discharge curves of PVA-PAA coated Li|LFP and Li|LFP cell.

Table S1. Impedances from Nyquist plots of symmetric cell of Li foil with and without coating at 0th, 50th, 100th and 200th cycles  $1 \text{ mA cm}^{-2}$  and  $1 \text{ mAh cm}^{-2}$ .

|                       | Cycle Number | 0     | 50 <sup>th</sup> | 100 <sup>th</sup> | 200 <sup>th</sup> |
|-----------------------|--------------|-------|------------------|-------------------|-------------------|
| $R_{overall}(\Omega)$ | Li           | 415.2 | 175.1            | 190.0             | 253.7             |
|                       | PVA-PAA      | 762.4 | 95.1             | 88.1              | 93.2              |
